# Supplementary material for: Insight into the mesogenic character of 15-membered triolefinic azamacrocycles, and their diolefinic open precursors and Pd(0) complexes
Source: Royal Society of Chemistry journal article supplement (doi:10.1039/b502561c), 2005-01-01
Supplement: b502561c.pdf [file b502561c.pdf]

## Supplementary data

### Insight into the Mesogenic Character of 15-Membered Triolefinic Azamacrocycles, and their Diolefinic Open Precursors and Pd(0)-complexes.

M. Moreno-Mañas,<sup>a</sup> Ch. Reichardt,<sup>a</sup> R.M. Sebastián,<sup>a,\*</sup> J. Barberá,<sup>b</sup> J.L. Serrano,<sup>b</sup>  
T. Sierra<sup>b,\*</sup>

<sup>a</sup>*Department of Chemistry, Universitat Autònoma de Barcelona, 08193-Cerdanyola del Vallès (Barcelona), Spain*

*Instituto de Ciencia de Materiales de Aragón. Química Orgánica, Facultad de Ciencia., Universidad de Zaragoza-C.S.I.C., 50009-Zaragoza, Spain*

Structural data of the mesophases measured by X-ray diffraction. Each column lists, respectively, the compound name, the temperature of the experiment, the mesophase type, the measured spacings, the proposed indexing, and the measured parameters ( $d$ : layer thickness in the SmC phase;  $a$ ,  $b$ : lattice constants in the columnar mesophases).

| Compound | Temperature (°C) | Mesophase        | Spacings (Å) | $h k$ | Parameters (Å) |
|----------|------------------|------------------|--------------|-------|----------------|
| 2a       | 55               | SmC              | 36           | -     | $d = 36$       |
| 1c       | 75               | Col <sub>h</sub> | 34.3         | 1 0   | $a = 39.6$     |
| 1b       | 61               | Col <sub>h</sub> | 30.8         | 1 0   | $a = 35.6$     |
| 3b       | 65               | Col <sub>r</sub> | 34.3         | 2 0   | $a = 68.6$     |
|          |                  |                  | 25.6         | 1 1   | $b = 27.6$     |
|          |                  |                  | 17.15        | 4 0   |                |
|          |                  |                  | 13.8         | 0 2   |                |
